# Supplementary material for: Simultaneous generation of hydrides of bismuth, lead and tin in the presence of ferricyanide and application to determination in biominerals by ICP-AES
Source: Royal Society of Chemistry journal article supplement (doi:10.1039/b920280c), 2010-01-01
Supplement: b920280c.pdf [file b920280c.pdf]

**Table S1** Operating conditions for ICP-AES and HG system

| <i>ICP-AES</i>                                                       |                                          |
|----------------------------------------------------------------------|------------------------------------------|
| Rf power (W)                                                         | 1400                                     |
| Injector                                                             | Alumina, 2.0 mm orifice                  |
| Plasma Ar flow (L min <sup>-1</sup> )                                | 16                                       |
| Auxiliary Ar flow (L min <sup>-1</sup> )                             | 0.4                                      |
| Carrier (Nebulizer) Ar flow (L min <sup>-1</sup> )                   | 0.45                                     |
| Delay time (s)                                                       | 60                                       |
| No. of integrations                                                  | 5                                        |
| Integration time                                                     | Automatic (min 0.5 – max 5 s)            |
| Measurement mode                                                     | Axial view, peak area                    |
| Analytical lines (nm)                                                | 223.061 (Bi), 220.353 (Pb), 189.927 (Sn) |
| <i>Hydride generation</i>                                            |                                          |
| Sample acidity (% v/v HCl)                                           | 0.75                                     |
| Sample flow rate (mL min <sup>-1</sup> )                             | 6                                        |
| K <sub>3</sub> Fe(CN) <sub>6</sub> flow rate (mL min <sup>-1</sup> ) | 1.5                                      |
